# Supplementary material
Source: PubMed Central journal article supplement (PMC4675621)
Supplement: NIHMS740941-supplement-Supplemental_Digital_Content.pdf [file NIHMS740941-supplement-Supplemental_Digital_Content.pdf]

## **PM<sub>2.5</sub> and survival among older adults: Effect modification by particulate composition**

Marianthi-Anna Kioumourtzoglou, Elena Austin, Petros Koutrakis, Francesca Dominici, Joel Schwartz, Antonella Zanobetti

### **Supplemental Material**

#### **Contents**

|     |                                                                     |   |
|-----|---------------------------------------------------------------------|---|
| e-1 | Spatial Clustering Based on PM <sub>2.5</sub> Composition . . . . . | 2 |
| e-2 | Related Code . . . . .                                              | 9 |

#### **List of Tables**

|   |                                                                                                                                        |   |
|---|----------------------------------------------------------------------------------------------------------------------------------------|---|
| 1 | Cities per cluster and number of subjects and deaths. . . . .                                                                          | 3 |
| 2 | Within cluster (CL) estimated HR per 10 $\mu\text{g}/\text{m}^3$ of PM <sub>2.5</sub> and their 95% CIs, by group of clusters. . . . . | 8 |

#### **List of Figures**

|   |                                                                                                                                                                                                                                                                                                                                                                                                                                                                                                         |   |
|---|---------------------------------------------------------------------------------------------------------------------------------------------------------------------------------------------------------------------------------------------------------------------------------------------------------------------------------------------------------------------------------------------------------------------------------------------------------------------------------------------------------|---|
| 1 | Cities within the 21 clusters, by groupings. . . . .                                                                                                                                                                                                                                                                                                                                                                                                                                                    | 5 |
| 2 | Heatmap of the log of the species enrichment factors by cluster. The enrichment factors are defined as $\frac{\overline{S_{ij}}}{\overline{PM_{2.5i}}} \div \frac{\overline{S_j}}{\overline{PM_{2.5}}}$ , for $j$ species at site $i$ , <sup>1</sup> and they represent the enrichment of a specific species of PM <sub>2.5</sub> within a cluster, as compared to the entire sample, i.e. whether a cluster has higher relative contributions of that specific species vs. the other clusters. . . . . | 6 |
| 3 | Ratios of species over PM <sub>2.5</sub> mean concentrations within clusters (dimensionless). For PM <sub>2.5</sub> , the average cluster concentrations are presented ( $\mu\text{g}/\text{m}^3$ ). . . . .                                                                                                                                                                                                                                                                                            | 7 |

## Cluster Analyses

### *e-1 Spatial Clustering Based on PM<sub>2.5</sub> Composition*

We categorized cities in clusters with similar air pollution profiles. To do so, we employed a k-means clustering analysis.<sup>2</sup> K-means is an iterative algorithm that minimizes the Euclidean distance between each observation and the pre-defined k cluster centers, seeking to partition M points (in our analysis M is the number of species) in N dimensions (the number of cities) into k clusters.

As observations, we used modified Z-scores for each chemical species, which were calculated using the ratio of the species average between January 2003 and December 2008 at each site, divided by the corresponding PM<sub>2.5</sub> concentration at that site. We then employed the k-means clustering algorithm to cluster sites that have the most similar PM<sub>2.5</sub> composition together, using the Z-scores. The PM<sub>2.5</sub> chemical species included in the clustering were the ions NO<sub>3</sub><sup>-</sup>, Na<sup>+</sup>, K<sup>+</sup>, SO<sub>4</sub><sup>2-</sup>, NH<sub>4</sub><sup>+</sup>, elemental carbon (EC), organic carbon (OC), and the elements S, Cu, Fe, Zn, Ni, V, Ti, Mg, K, Si, Na, Cl, Ca, Br, Sr, Pb, Mn.

In our analysis, we specified the initial k values (cluster center points) to increase the stability of our solution, by identifying the k centers with hierarchical clustering.<sup>3</sup> The preliminary identification of the k centers also allowed for minimum impact of potential outlying observations. Given that this algorithm depends on the choice of the number of clusters k, subject specific knowledge is required to select the best number of clusters.<sup>4</sup> To this end, we used knowledge of air pollution sources and contributions, minimizing the variability of predefined concentration ratios of specific species,<sup>1</sup> as well as the number of single-city clusters. A more detailed description of the methods used for the spatial clustering is presented by Austin et al.<sup>1</sup>

eTable 1: Cities per cluster and number of subjects and deaths.

| City              | Cluster | No. Subjects | No. Deaths | Mean Age |
|-------------------|---------|--------------|------------|----------|
| Akron, OH         | 1       | 129,158      | 46,899     | 75.56    |
| Bath, NY          | 1       | 25,920       | 9,105      | 75.33    |
| Cincinnati, OH    | 1       | 192,292      | 71,065     | 75.58    |
| Columbus, OH      | 1       | 195,999      | 68,045     | 75.09    |
| Dover, DE         | 1       | 31,421       | 9,375      | 74.18    |
| Gettysburg, PA    | 1       | 24,151       | 7,449      | 75.04    |
| Greensburg, PA    | 1       | 114,001      | 41,440     | 75.58    |
| Harrisburg, PA    | 1       | 61,904       | 21,656     | 75.38    |
| Lancaster, PA     | 1       | 118,627      | 40,037     | 75.77    |
| Middletown, OH    | 1       | 68,712       | 23,393     | 74.73    |
| Rochester, NY     | 1       | 166,479      | 58,050     | 75.89    |
| Scranton, PA      | 1       | 160,546      | 65,063     | 76.06    |
| State College, PA | 1       | 26,552       | 8,540      | 75.10    |
| Washington, DC    | 1       | 149,574      | 47,440     | 76.22    |
| Washington, PA    | 1       | 62,845       | 23,249     | 75.66    |
| Winston-Salem, NC | 1       | 77,165       | 25,390     | 74.92    |
| Atlanta, GA       | 2       | 439,291      | 130,324    | 74.68    |
| Augusta, GA       | 2       | 37,936       | 13,153     | 74.66    |
| Burlington, VT    | 2       | 29,091       | 9,109      | 75.17    |
| Charlotte, NC     | 2       | 129,147      | 38,499     | 74.90    |
| Chattanooga, TN   | 2       | 79,070       | 27,311     | 75.08    |
| Greenville, SC    | 2       | 93,791       | 29,611     | 74.75    |
| Hickory, NC       | 2       | 36,221       | 11,848     | 74.55    |
| Knoxville, TN     | 2       | 120,649      | 40,972     | 74.92    |
| Little Rock, AR   | 2       | 76,921       | 26,092     | 75.27    |
| Nashville, TN     | 2       | 116,528      | 40,272     | 75.23    |
| Tallahassee, FL   | 2       | 41,424       | 12,891     | 75.09    |
| Allentown, PA     | 3       | 157,331      | 54,641     | 75.74    |
| Beaver Dam, WI    | 3       | 22,737       | 7,774      | 75.76    |
| Chicago, IL       | 3       | 1,285,802    | 441,220    | 75.50    |
| Evansville, IN    | 3       | 44,884       | 16,855     | 75.71    |
| Grand Rapids, MI  | 3       | 110,459      | 37,055     | 75.52    |
| Indianapolis, IN  | 3       | 169,547      | 60,349     | 75.28    |
| Louisville, KY    | 3       | 165,275      | 59,783     | 75.21    |
| Toledo, OH        | 3       | 97,880       | 37,150     | 75.55    |
| Boston, MA        | 4       | 590,615      | 199,689    | 75.88    |
| Elizabeth, NJ     | 4       | 124,695      | 40,284     | 75.88    |
| Middlesex, NJ     | 4       | 164,094      | 50,662     | 75.44    |
| Philadelphia, PA  | 4       | 1,051,643    | 385,935    | 75.69    |
| Wilmington, DE    | 4       | 105,192      | 34,875     | 75.16    |

*Continued on next page*

eTable 1 – *Continued from previous page*

| City               | Cluster | No. Subjects | No. Deaths | Mean Age |
|--------------------|---------|--------------|------------|----------|
| Dallas, TX         | 5       | 345,887      | 107,824    | 74.80    |
| Macon, GA          | 5       | 38,533       | 13,994     | 75.19    |
| Oklahoma city, OK  | 5       | 150,558      | 52,091     | 75.07    |
| Tulsa, OK          | 5       | 131,556      | 45,488     | 75.07    |
| Canton, OH         | 6       | 106,223      | 38,076     | 75.43    |
| Cleveland, OH      | 6       | 460,334      | 171,576    | 75.74    |
| Detroit, MI        | 6       | 833,786      | 303,496    | 75.47    |
| Madison, IL        | 6       | 65,611       | 23,933     | 75.35    |
| Cedar Rapids, IA   | 7       | 43,765       | 14,513     | 75.45    |
| Des Moines, IA     | 7       | 78,372       | 26,044     | 75.38    |
| Kansas City, KS    | 7       | 303,035      | 104,278    | 75.34    |
| Minneapolis, MN    | 7       | 316,088      | 103,998    | 75.92    |
| Buffalo, NY        | 8       | 239,595      | 90,500     | 75.74    |
| Davenport, IA      | 8       | 73,588       | 25,380     | 75.45    |
| Pittsburgh, PA     | 8       | 351,259      | 135,693    | 76.00    |
| St. Louis, MO      | 8       | 351,018      | 130,270    | 75.63    |
| Fresno, CA         | 9       | 146,228      | 46,892     | 75.34    |
| Riverside, CA      | 9       | 695,165      | 206,934    | 74.79    |
| Sacramento, CA     | 9       | 253,698      | 78,074     | 75.23    |
| Charleston, SC     | 10      | 70,448       | 21,607     | 74.95    |
| Houston, TX        | 10      | 510,950      | 154,406    | 74.44    |
| Tampa, FL          | 10      | 240,184      | 73,363     | 75.00    |
| Erie, PA           | 11      | 67,508       | 25,019     | 75.69    |
| Milwaukee, WI      | 11      | 276,230      | 101,527    | 75.77    |
| York, PA           | 11      | 95,883       | 31,220     | 75.12    |
| Phoenix, AZ        | 12      | 682,866      | 200,388    | 75.01    |
| Tucson, AZ         | 12      | 231,725      | 66,604     | 74.99    |
| San Diego, CA      | 13      | 571,128      | 17,4001    | 75.44    |
| Ventura, CA        | 13      | 157,695      | 44,466     | 75.23    |
| Grand Junction, CO | 14      | 360,15       | 10,907     | 75.21    |
| Reno, NV           | 14      | 84,379       | 23,909     | 74.35    |
| Fargo, ND          | 15      | 23,093       | 7,253      | 75.71    |
| Provo, UT          | 15      | 49,561       | 14,338     | 74.83    |
| Portland, OR       | 16      | 292,293      | 97,052     | 75.68    |
| Seattle, WA        | 16      | 340,433      | 103,316    | 75.70    |
| Layton, UT         | 17      | 37,272       | 10,189     | 74.43    |
| Salt Lake City, UT | 17      | 138,049      | 42,689     | 75.06    |
| Birmingham, AL     | 18      | 211,866      | 79,621     | 75.14    |
| Los Angeles, CA    | 19      | 1,629,036    | 485,732    | 75.34    |
| New York, NY       | 20      | 1,517,097    | 474,471    | 75.80    |
| Youngstown, OH     | 21      | 130,955      | 49,676     | 75.65    |

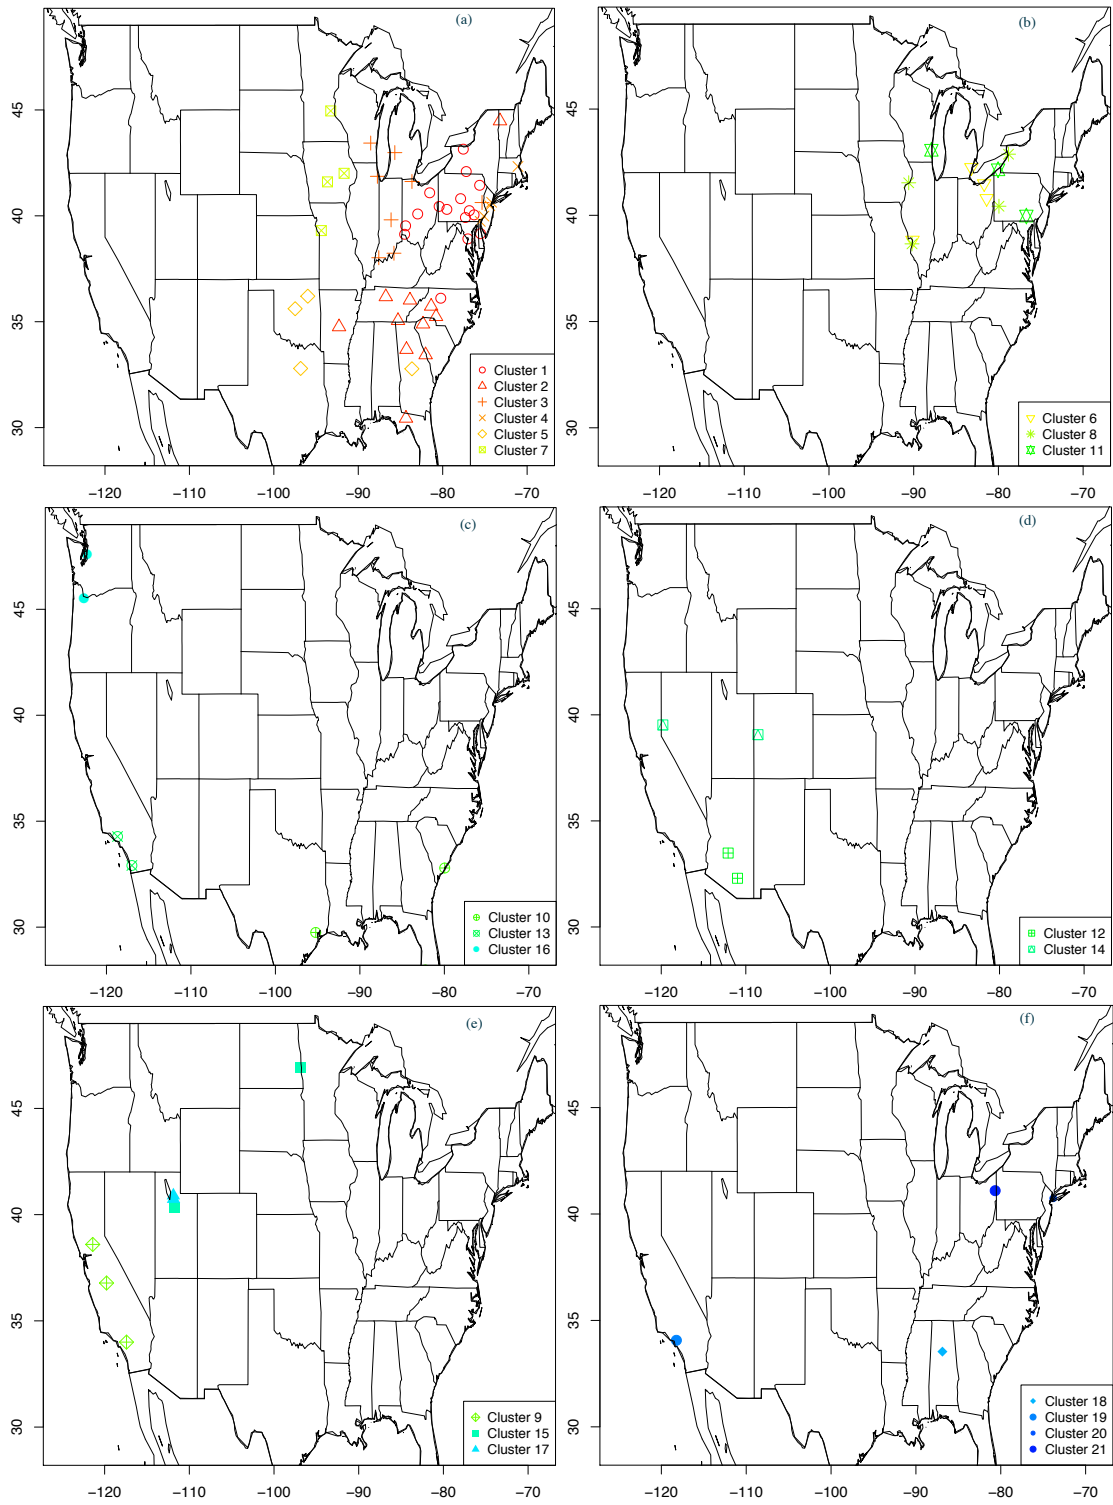

**eFigure 1:** Cities within the 21 clusters, by groupings.

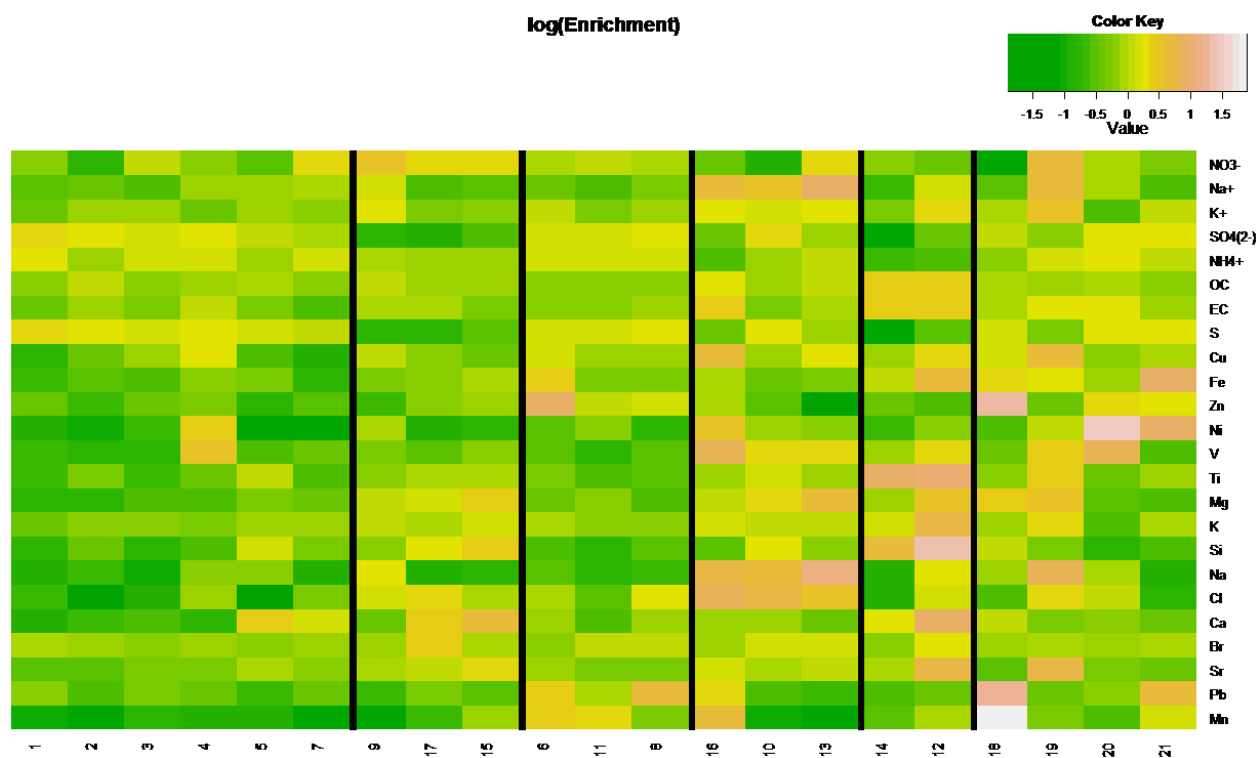

**eFigure 2:** Heatmap of the log of the species enrichment factors by cluster. The enrichment factors are defined as  $\frac{\overline{S_{ij}}}{\overline{PM_{2.5i}}} \div \frac{\overline{S_j}}{\overline{PM_{2.5}}}$ , for  $j$  species at site  $i$ ,<sup>1</sup> and they represent the enrichment of a specific species of  $PM_{2.5}$  within a cluster, as compared to the entire sample, i.e. whether a cluster has higher relative contributions of that specific species vs. the other clusters.

|       | Cluster 1 | Cluster 2 | Cluster 3 | Cluster 4 | Cluster 5 | Cluster 6 | Cluster 7 | Cluster 8 | Cluster 9 | Cluster 10 | Cluster 11 | Cluster 12 | Cluster 13 | Cluster 14 | Cluster 15 | Cluster 16 | Cluster 17 | Cluster 18 | Cluster 19 | Cluster 20 | Cluster 21 |
|-------|-----------|-----------|-----------|-----------|-----------|-----------|-----------|-----------|-----------|------------|------------|------------|------------|------------|------------|------------|------------|------------|------------|------------|------------|
| PM2.5 | 12.92     | 13.33     | 13.41     | 13.09     | 12.43     | 14.54     | 10.30     | 13.25     | 16.68     | 10.94      | 13.44      | 7.80       | 12.26      | 9.02       | 9.43       | 8.36       | 11.07      | 16.78      | 17.88      | 12.82      | 14.14      |
| NO3   | 0.13      | 0.07      | 0.17      | 0.13      | 0.09      | 0.16      | 0.22      | 0.16      | 0.28      | 0.06       | 0.16       | 0.10       | 0.24       | 0.13       | 0.23       | 0.11       | 0.23       | 0.05       | 0.30       | 0.16       | 0.12       |
| NA+   | 0.01      | 0.01      | 0.01      | 0.01      | 0.01      | 0.01      | 0.01      | 0.01      | 0.01      | 0.02       | 0.01       | 0.01       | 0.03       | 0.01       | 0.01       | 0.02       | 0.01       | 0.01       | 0.02       | 0.01       | 0.01       |
| K+    | 0.00      | 0.00      | 0.00      | 0.00      | 0.00      | 0.00      | 0.00      | 0.00      | 0.00      | 0.01       | 0.00       | 0.01       | 0.01       | 0.00       | 0.00       | 0.01       | 0.00       | 0.00       | 0.01       | 0.00       | 0.01       |
| SO4   | 0.33      | 0.29      | 0.27      | 0.29      | 0.25      | 0.27      | 0.23      | 0.28      | 0.10      | 0.31       | 0.27       | 0.15       | 0.20       | 0.08       | 0.13       | 0.15       | 0.09       | 0.25       | 0.17       | 0.29       | 0.29       |
| NH4   | 0.14      | 0.10      | 0.14      | 0.13      | 0.10      | 0.13      | 0.14      | 0.14      | 0.11      | 0.10       | 0.13       | 0.15       | 0.12       | 0.05       | 0.10       | 0.06       | 0.10       | 0.09       | 0.13       | 0.14       | 0.12       |
| OC    | 0.27      | 0.35      | 0.27      | 0.30      | 0.33      | 0.26      | 0.28      | 0.28      | 0.38      | 0.31       | 0.28       | 0.56       | 0.35       | 0.53       | 0.31       | 0.44       | 0.30       | 0.32       | 0.29       | 0.31       | 0.28       |
| EC    | 0.04      | 0.05      | 0.04      | 0.07      | 0.04      | 0.05      | 0.03      | 0.05      | 0.06      | 0.04       | 0.05       | 0.09       | 0.05       | 0.10       | 0.04       | 0.09       | 0.06       | 0.06       | 0.08       | 0.08       | 0.05       |
| S     | 108.09    | 95.75     | 89.99     | 94.14     | 84.64     | 87.77     | 79.86     | 95.99     | 33.79     | 101.11     | 90.11      | 46.88      | 64.23      | 25.55      | 43.29      | 49.98      | 31.83      | 85.21      | 56.94      | 97.78      | 95.70      |
| Ca    | 0.20      | 0.29      | 0.38      | 0.57      | 0.23      | 0.50      | 0.19      | 0.40      | 0.46      | 0.39       | 0.38       | 0.61       | 0.57       | 0.39       | 0.28       | 0.82       | 0.36       | 0.52       | 0.86       | 0.36       | 0.44       |
| Fe    | 4.88      | 5.76      | 5.34      | 7.65      | 6.91      | 15.71     | 4.53      | 7.29      | 7.05      | 6.58       | 7.51       | 18.83      | 7.27       | 11.10      | 9.38       | 9.43       | 8.03       | 14.37      | 13.17      | 8.97       | 25.64      |
| Ni    | 0.07      | 0.06      | 0.08      | 0.08      | 0.05      | 0.10      | 0.06      | 0.08      | 0.17      | 0.15       | 0.14       | 0.13       | 0.13       | 0.08       | 0.08       | 0.29       | 0.07       | 0.09       | 0.18       | 0.82       | 0.45       |
| V     | 0.09      | 0.09      | 0.08      | 0.34      | 0.11      | 0.11      | 0.13      | 0.11      | 0.14      | 0.28       | 0.08       | 0.26       | 0.27       | 0.16       | 0.16       | 0.45       | 0.11       | 0.13       | 0.30       | 0.45       | 0.40       |
| Tl    | 0.19      | 0.29      | 0.19      | 0.28      | 0.45      | 0.30      | 0.23      | 0.25      | 0.34      | 0.47       | 0.21       | 1.13       | 0.36       | 1.06       | 0.40       | 0.38       | 0.41       | 0.32       | 0.63       | 0.26       | 0.36       |
| Mg    | 0.41      | 0.41      | 0.52      | 0.51      | 0.66      | 0.62      | 0.64      | 0.52      | 0.97      | 1.31       | 0.77       | 1.72       | 1.83       | 0.79       | 1.51       | 0.96       | 1.09       | 1.50       | 1.58       | 0.57       | 0.51       |
| K     | 4.45      | 5.58      | 5.66      | 4.88      | 5.89      | 6.54      | 5.91      | 5.60      | 7.52      | 7.15       | 5.25       | 14.56      | 7.23       | 7.87       | 8.38       | 8.02       | 6.71       | 6.03       | 9.52       | 3.77       | 6.67       |
| Si    | 4.62      | 7.15      | 4.72      | 5.58      | 13.27     | 6.05      | 7.87      | 6.15      | 8.78      | 13.83      | 4.96       | 43.93      | 8.46       | 21.33      | 17.59      | 6.31       | 14.17      | 11.26      | 7.84       | 4.70       | 5.85       |
| Na    | 2.67      | 3.22      | 2.40      | 5.15      | 5.10      | 3.88      | 2.62      | 2.99      | 8.17      | 12.58      | 2.78       | 8.12       | 20.85      | 2.53       | 2.93       | 14.12      | 2.56       | 5.40       | 14.34      | 6.31       | 2.66       |
| Cl    | 1.55      | 0.95      | 1.33      | 3.02      | 0.96      | 3.13      | 2.46      | 4.26      | 3.94      | 7.01       | 1.95       | 3.88       | 5.77       | 1.37       | 3.13       | 7.81       | 4.78       | 1.81       | 4.56       | 3.65       | 1.46       |
| Ca    | 2.30      | 2.98      | 3.27      | 2.72      | 9.41      | 4.97      | 7.14      | 5.38      | 4.06      | 5.10       | 3.08       | 15.74      | 3.89       | 8.06       | 11.55      | 5.01       | 9.26       | 6.11       | 4.37       | 4.80       | 3.75       |
| Br    | 0.28      | 0.24      | 0.22      | 0.25      | 0.22      | 0.24      | 0.25      | 0.31      | 0.24      | 0.32       | 0.29       | 0.38       | 0.33       | 0.22       | 0.27       | 0.25       | 0.47       | 0.24       | 0.29       | 0.25       | 0.28       |
| Sr    | 0.06      | 0.06      | 0.07      | 0.07      | 0.09      | 0.08      | 0.07      | 0.07      | 0.09      | 0.09       | 0.07       | 0.20       | 0.10       | 0.10       | 0.14       | 0.11       | 0.10       | 0.06       | 0.20       | 0.07       | 0.06       |
| Pb    | 0.29      | 0.20      | 0.28      | 0.25      | 0.19      | 0.58      | 0.24      | 0.68      | 0.18      | 0.19       | 0.36       | 0.25       | 0.19       | 0.20       | 0.23       | 0.53       | 0.26       | 1.24       | 0.24       | 0.38       | 0.74       |
| Mn    | 0.14      | 0.12      | 0.16      | 0.16      | 0.15      | 0.63      | 0.13      | 0.29      | 0.13      | 0.14       | 0.54       | 0.36       | 0.13       | 0.22       | 0.34       | 0.71       | 0.19       | 2.53       | 0.27       | 0.21       | 0.45       |

**Figure 3:** Ratios of species over PM<sub>2.5</sub> mean concentrations within clusters (dimensionless). For PM<sub>2.5</sub>, the average cluster concentrations are presented ( $\mu\text{g}/\text{m}^3$ ).

**eTable 2:** Within cluster (CL) estimated HR per 10  $\mu\text{g}/\text{m}^3$  of  $\text{PM}_{2.5}$  and their 95% CIs, by group of clusters.

| Cluster | HR          | 95% CI              |
|---------|-------------|---------------------|
| Group 1 |             |                     |
| CL-1    | 0.94        | (0.76, 1.16)        |
| CL-2    | <b>1.46</b> | <b>(1.14, 1.86)</b> |
| CL-3    | 1.00        | (0.76, 1.33)        |
| CL-4    | 1.17        | (0.82, 1.66)        |
| CL-5    | 1.25        | (0.84, 1.85)        |
| CL-7    | 1.24        | (0.82, 1.88)        |
| Group 2 |             |                     |
| CL-9    | 0.87        | (0.56, 1.36)        |
| CL-15   | 0.65        | (0.34, 1.25)        |
| CL-17   | 0.84        | (0.48, 1.48)        |
| Group 3 |             |                     |
| CL-6    | 1.12        | (0.75, 1.65)        |
| CL-8    | 1.35        | (0.91, 2.00)        |
| CL-11   | 1.49        | (0.94, 2.35)        |
| Group 4 |             |                     |
| CL-10   | <b>1.71</b> | <b>(1.08, 2.72)</b> |
| CL-13   | <b>0.44</b> | <b>(0.25, 0.77)</b> |
| CL-16   | <b>1.91</b> | <b>(1.10, 3.32)</b> |
| Group 5 |             |                     |
| CL-12   | 0.93        | (0.52, 1.65)        |
| CL-14   | 0.77        | (0.43, 1.38)        |
| Group 6 |             |                     |
| CL-18   | 1.66        | (0.76, 3.60)        |
| CL-19   | 1.42        | (0.66, 3.08)        |
| CL-20   | 1.17        | (0.54, 2.53)        |
| CL-21   | 0.97        | (0.44, 2.15)        |



### SAS code: City-specific Cox Models

```
proc phreg data=city_i;
model count*dead(0)= pm25 year coronarycare intenscare diabetes
copd mi chf / ties=exact;
strata followup age sex race;
run;
```

### R code: Random Effects Meta-analysis

```
library(meta)
library(rmeta)

model.pm <- mvmeta(I(dta$est*10)~1, S=(dta$se*10)^2, method="reml",
na.action="na.omit")
model.clust <- mvmeta(I(dta$est*10) ~ as.factor(dta$cluster),
S=(dta$se*10)^2, method="reml", na.action="na.omit")
```

### References

1. E. Austin, B.A. Coull, A. Zanobetti, P. Koutrakis. A framework to spatially cluster air pollution monitoring sites in US based on the PM<sub>2.5</sub> composition. *Environment International*, 59:244–254, 2013.
2. JA Hartigan, MA Wong. Algorithm as 136: A k-means clustering algorithm. *Applied statistics*, pages 100–108, 1979.
3. R Maitra, AD Peterson, AP Ghosh. A systematic evaluation of different methods for initializing the k-means clustering algorithm. *IEEE Transactions on Knowledge and Data Engineering*, pages 522–537, 2010.
4. AK Jain, MN Murty, PJ Flynn. Data clustering: a review. *ACM computing surveys (CSUR)*, 31(3):264–323, 1999.
